# Supplementary material for: Long-Term Results of Thermal Ablation of Benign Thyroid Nodules: A Systematic Review and Meta-Analysis
Source: PubMed Central journal article supplement — Endocrinol Metab (Seoul). 2020 Jun 30;35(2):339–50. doi: 10.3803/EnM.2020.35.2.339 (PMC7386110; doi:10.3803/enm.2020.35.2.339), 2020-06-30
Supplement: enm-2020-35-2-339-Suppl.pdf [file enm-2020-35-2-339-Suppl.pdf]

**Supplemental Table S1.** Etiology of Delayed Surgeries

| Group | Study                             | Patients with delayed surgery | Etiology of delayed surgery                                                        | Pathology                                                                                                      |
|-------|-----------------------------------|-------------------------------|------------------------------------------------------------------------------------|----------------------------------------------------------------------------------------------------------------|
| RFA   | Aldea Martinez et al. (2019) [10] | NA                            | NA                                                                                 | NA                                                                                                             |
| RFA   | Deandrea et al. (2019) [11]       | NA                            | NA                                                                                 | NA                                                                                                             |
| RFA   | Jung et al. (2018) [12]           | 0                             | 0                                                                                  | NA                                                                                                             |
| RFA   | Lim et al. (2013) [13]            | NA                            | NA                                                                                 | NA                                                                                                             |
| RFA   | Sim et al. (2017) [14]            | NA                            | NA                                                                                 | NA                                                                                                             |
| LA    | Dossing et al. (2011) [3]         | 27 of 78                      | 6 (<6 mo), 21 (12–114 mo) Thyroid surgery after LA due to an unsatisfactory result | All benign histology                                                                                           |
| LA    | Gambelunghe et al. (2013) [4]     | NA                            | NA                                                                                 | NA                                                                                                             |
| LA    | Gambelunghe et al. (2018) [5]     | NA                            | NA                                                                                 | NA                                                                                                             |
| LA    | Magri et al. (2020) [6]           | 10 of 43                      | 4 Lobectomy and 6 total thyroidectomy due to no response                           | 8 Colloid cystic nodules, 1 follicular tumor of uncertain malignant potential (FT-UMP), 1 follicular carcinoma |
| LA    | Negro et al. (2019) [7]           | 6 of 62                       | Due to regrowth with persistence of cosmetic concern or compressive symptoms       | 1 Follicular variant of papillary thyroid cancer, otherwise NA                                                 |
| LA    | Papini et al. (2014) [8]          | NA                            | NA                                                                                 | NA                                                                                                             |
| LA    | Valcavi et al. (2010) [9]         | NA                            | NA                                                                                 | NA                                                                                                             |

RFA, radiofrequency ablation; NA, not available; LA, laser ablation.

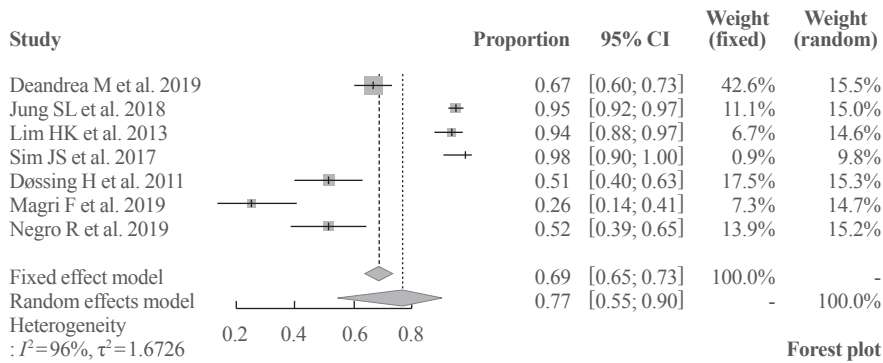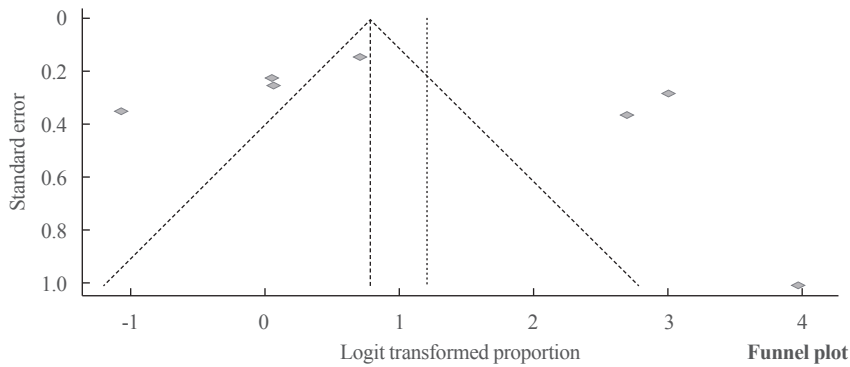

**Supplemental Fig. S1.** Forest and funnel plots of the pooled proportion of volume reduction rate at last follow-up. CI, confidence interval.
